# Supplementary material for: Comparison of normalization methods for the analysis of metagenomic gene abundance data
Source: PubMed Central journal article supplement (PMC5910605; doi:10.1186/s12864-018-4637-6), 2018-04-20

**TMM**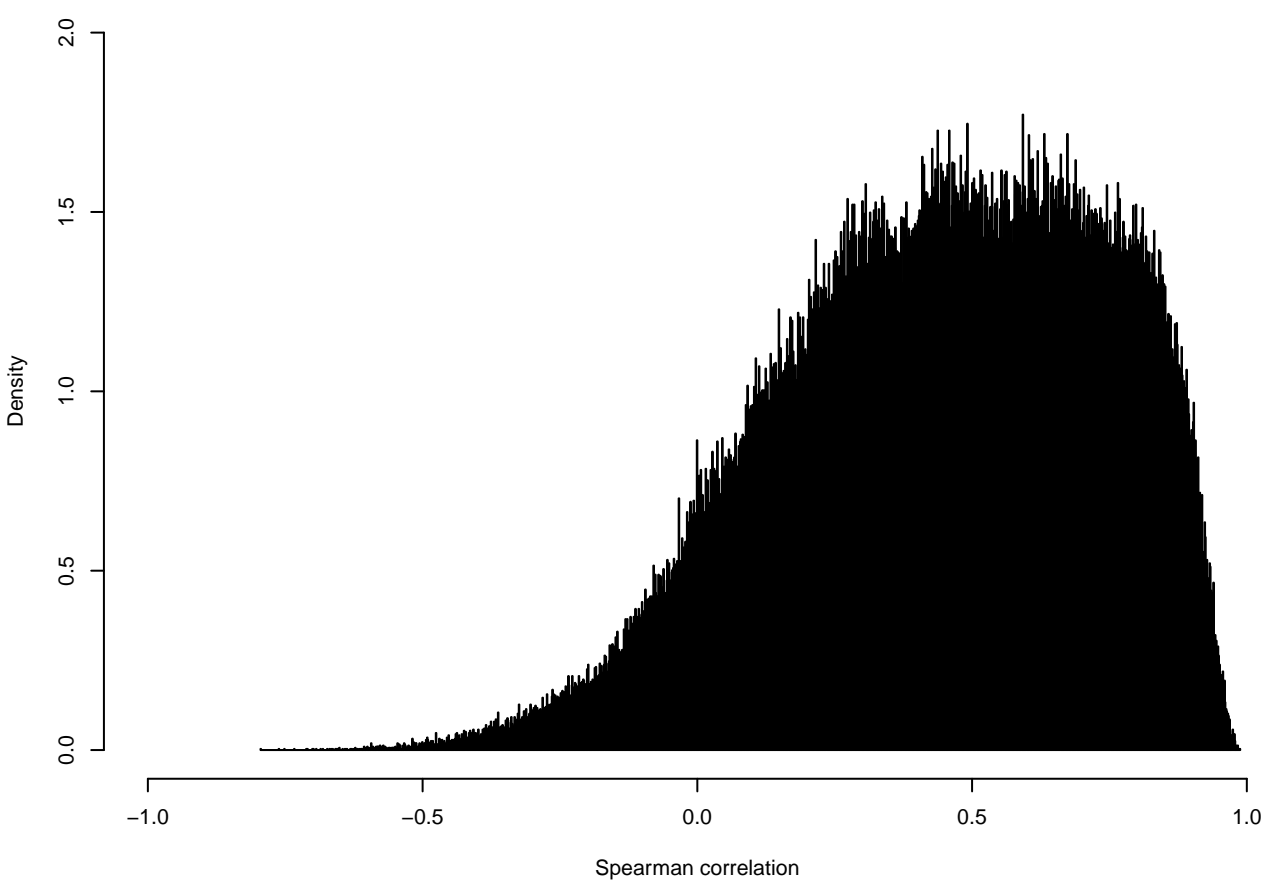**RLE**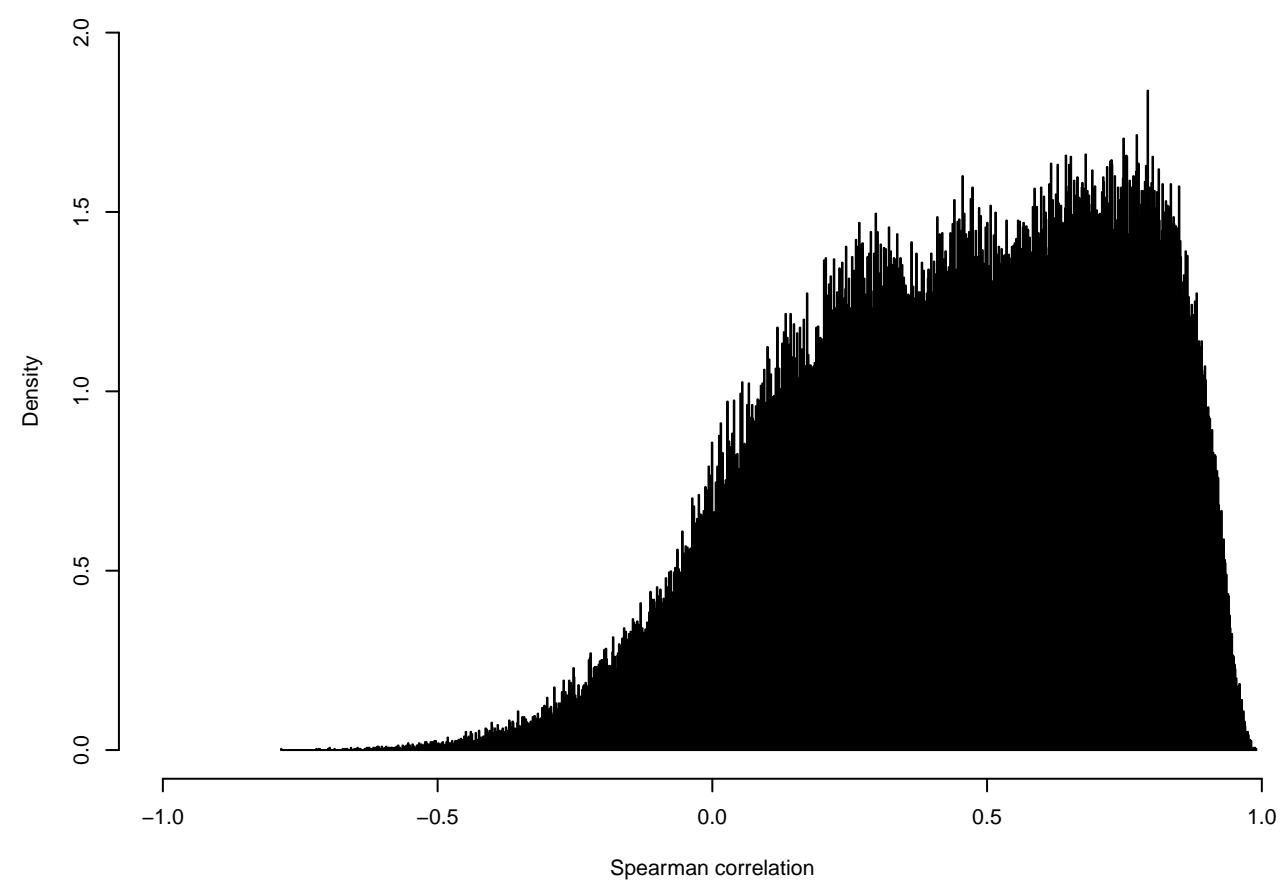**CSS**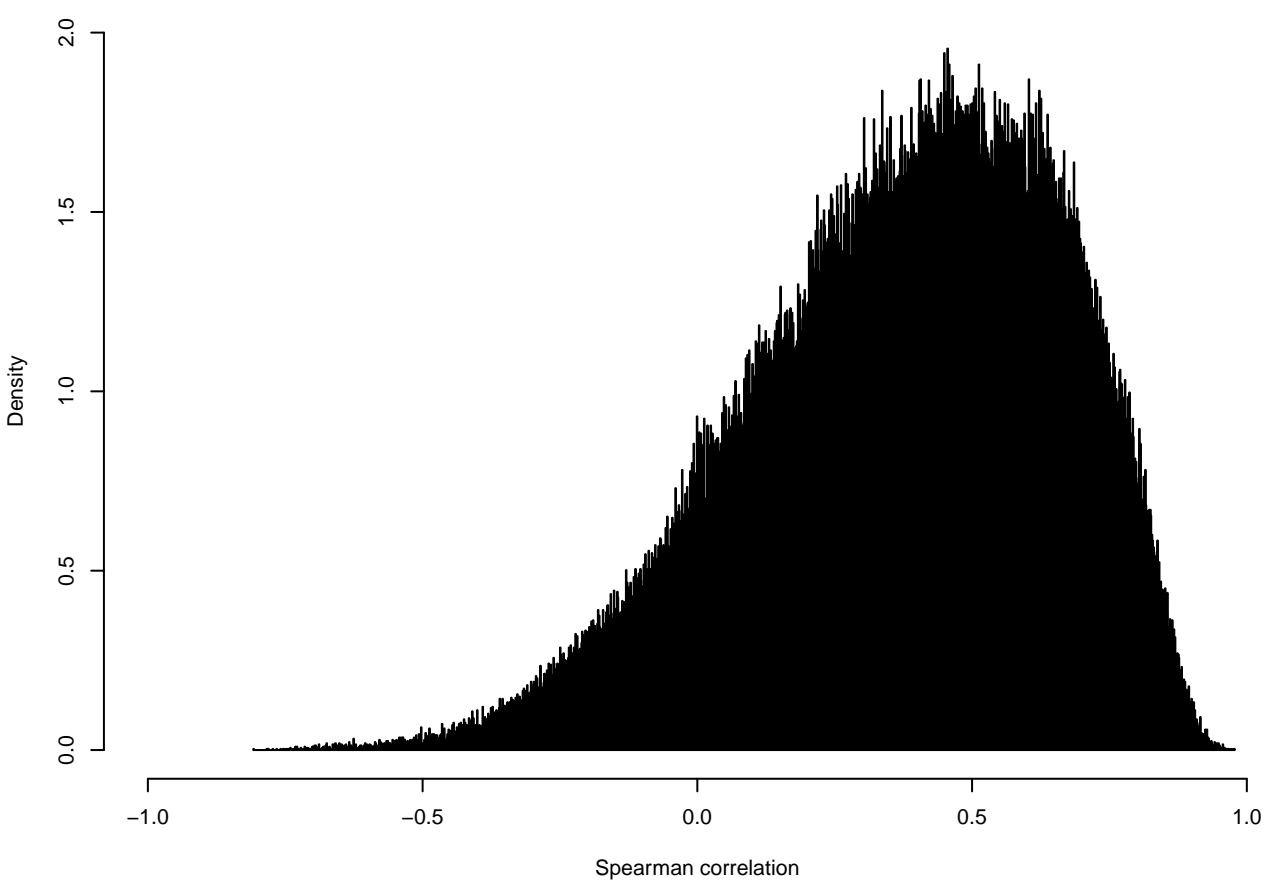**RCSS**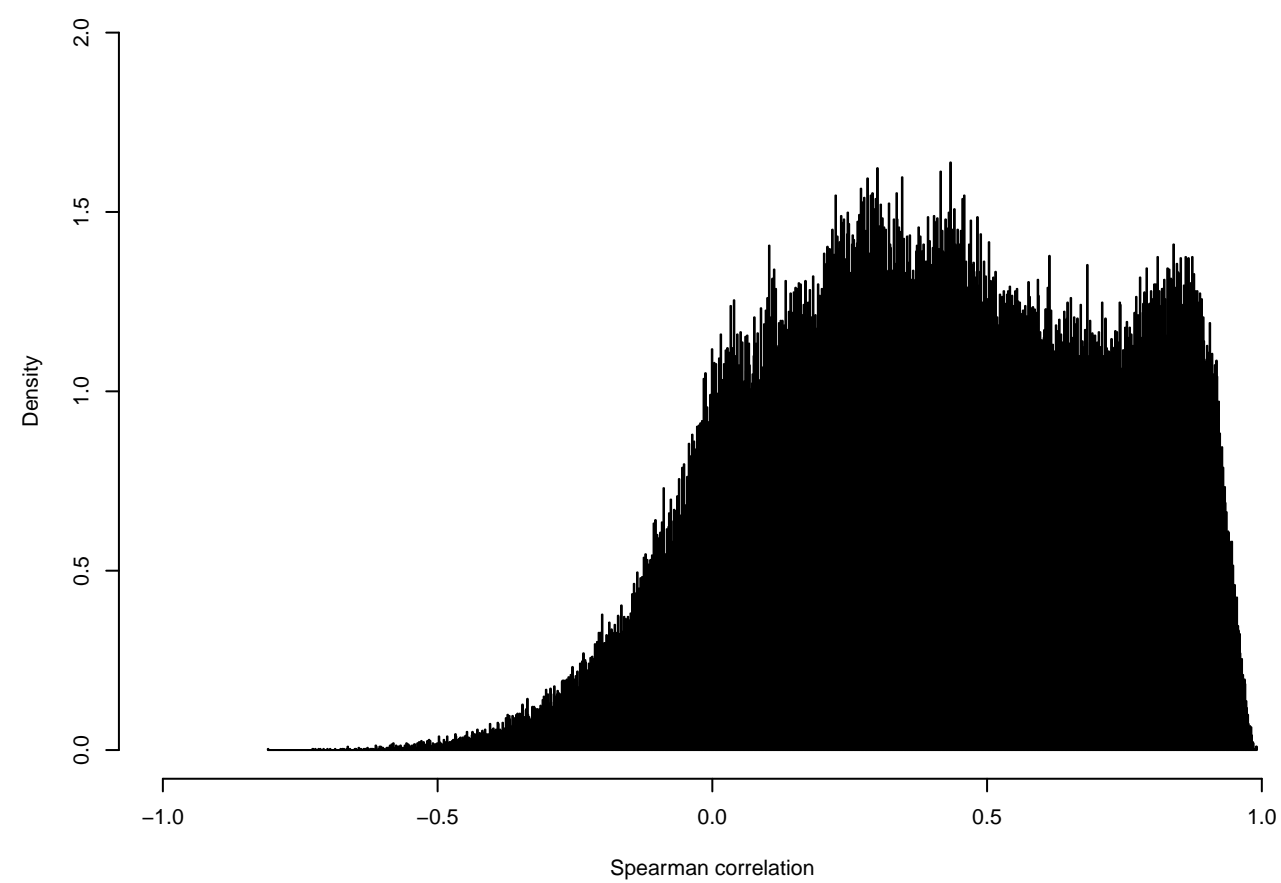**UQ**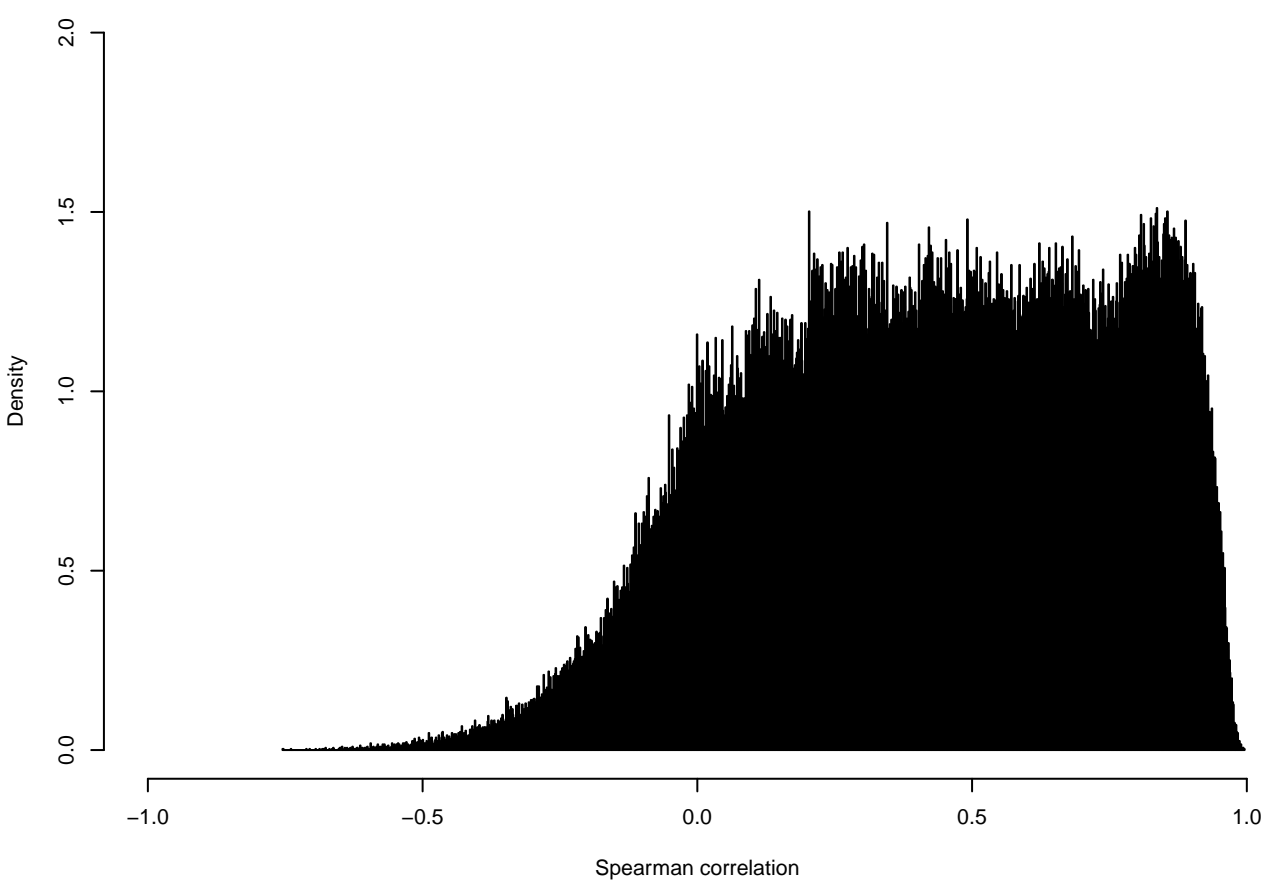**Med**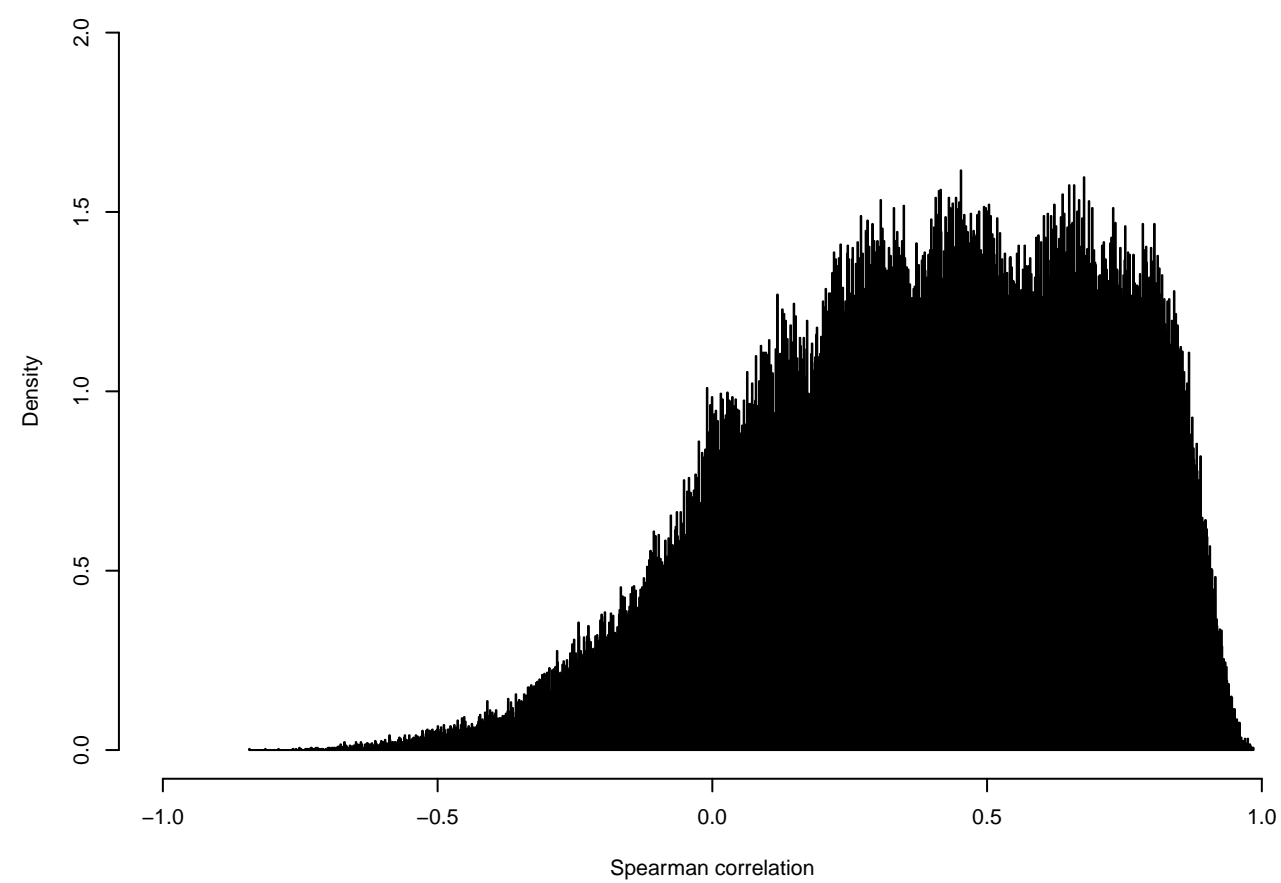**TC**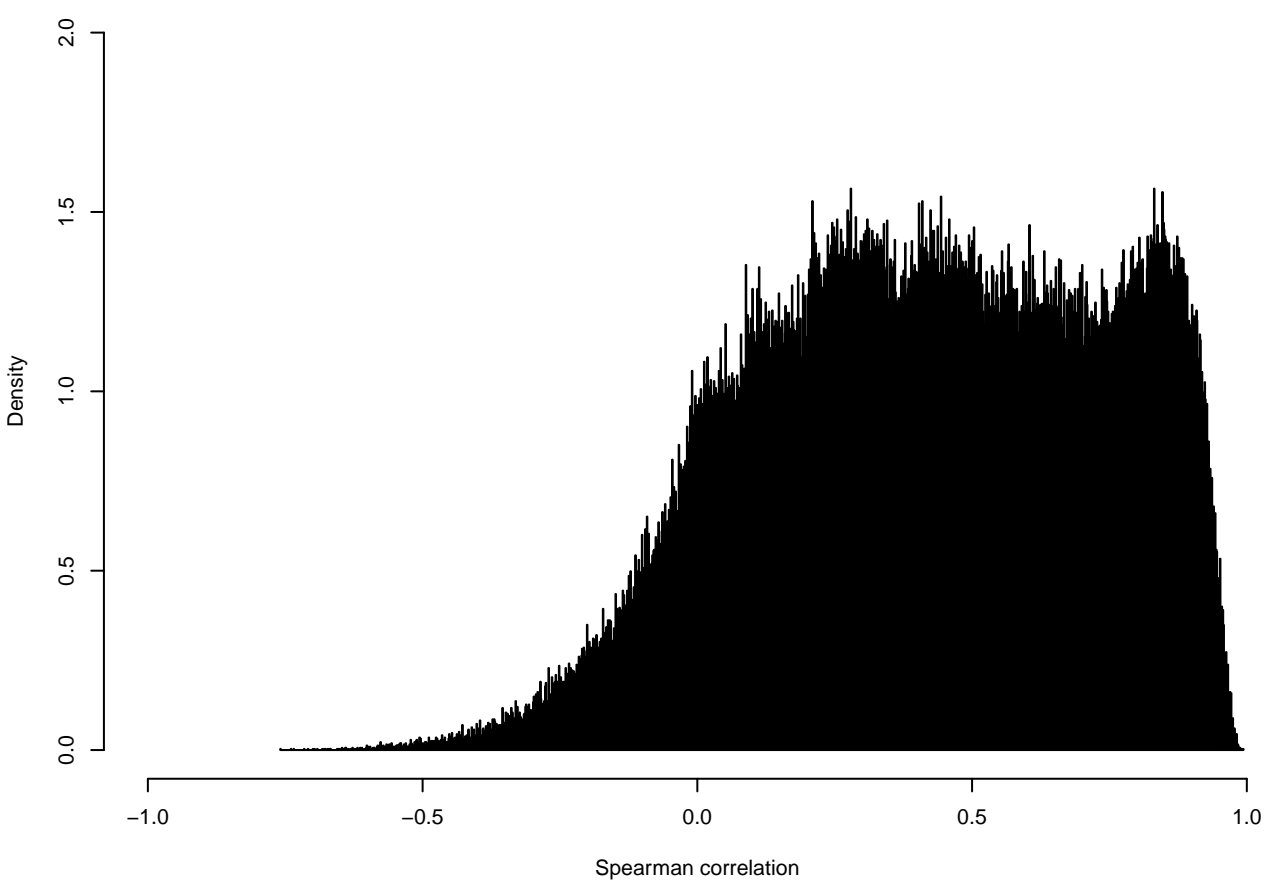

Supplement: 12864_2018_4637_MOESM1_ESM.pdf [file 12864_2018_4637_MOESM1_ESM.pdf]
