# Supplementary material for: Comparison of normalization methods for the analysis of metagenomic gene abundance data
Source: PubMed Central journal article supplement (PMC5910605; doi:10.1186/s12864-018-4637-6), 2018-04-20
Supplement: 12864_2018_4637_MOESM4_ESM.pdf [file 12864_2018_4637_MOESM4_ESM.pdf]

**Table S1 True positive rate at a fixed false positive rate of 0.01 for a group size of 10 + 10.**

| <b>fold change: 3</b> |      | Human gut I |      |      |      | Human gut II |      |      |      | Marine |      |      |  |
|-----------------------|------|-------------|------|------|------|--------------|------|------|------|--------|------|------|--|
| Method                | B    | LU          | U    | HU   | B    | LU           | U    | HU   | B    | LU     | U    | HU   |  |
| TMM                   | 0.62 | 0.61        | 0.58 | 0.48 | 0.63 | 0.66         | 0.59 | 0.43 | 0.66 | 0.66   | 0.61 | 0.54 |  |
| RLE                   | 0.63 | 0.60        | 0.55 | 0.42 | 0.62 | 0.64         | 0.60 | 0.46 | 0.66 | 0.65   | 0.59 | 0.49 |  |
| CSS                   | 0.61 | 0.59        | 0.53 | 0.39 | 0.65 | 0.66         | 0.55 | 0.36 | 0.69 | 0.67   | 0.61 | 0.49 |  |
| RCSS                  | 0.61 | 0.58        | 0.56 | 0.43 | 0.62 | 0.66         | 0.59 | 0.47 | 0.65 | 0.61   | 0.50 | 0.33 |  |
| quantile-quantile     | 0.69 | 0.65        | 0.56 | 0.34 | 0.64 | 0.63         | 0.54 | 0.38 | 0.67 | 0.62   | 0.46 | 0.27 |  |
| upper quartile        | 0.61 | 0.57        | 0.49 | 0.28 | 0.63 | 0.66         | 0.56 | 0.37 | 0.66 | 0.58   | 0.42 | 0.25 |  |
| median                | 0.62 | 0.58        | 0.50 | 0.33 | 0.64 | 0.65         | 0.52 | 0.29 | 0.68 | 0.65   | 0.59 | 0.43 |  |
| total count           | 0.61 | 0.58        | 0.54 | 0.39 | 0.63 | 0.65         | 0.57 | 0.42 | 0.65 | 0.61   | 0.49 | 0.33 |  |
| rarefying             | 0.63 | 0.60        | 0.57 | 0.42 | 0.49 | 0.49         | 0.44 | 0.34 | 0.66 | 0.61   | 0.50 | 0.34 |  |
| <b>fold change: 5</b> |      | Human gut I |      |      |      | Human gut II |      |      |      | Marine |      |      |  |
| Method                | B    | LU          | U    | HU   | B    | LU           | U    | HU   | B    | LU     | U    | HU   |  |
| TMM                   | 0.72 | 0.72        | 0.70 | 0.60 | 0.83 | 0.81         | 0.79 | 0.65 | 0.78 | 0.77   | 0.75 | 0.64 |  |
| RLE                   | 0.72 | 0.72        | 0.67 | 0.54 | 0.83 | 0.79         | 0.79 | 0.68 | 0.78 | 0.77   | 0.73 | 0.57 |  |
| CSS                   | 0.74 | 0.72        | 0.63 | 0.46 | 0.84 | 0.80         | 0.71 | 0.42 | 0.81 | 0.80   | 0.69 | 0.51 |  |
| RCSS                  | 0.70 | 0.70        | 0.66 | 0.53 | 0.82 | 0.81         | 0.77 | 0.65 | 0.77 | 0.70   | 0.59 | 0.37 |  |
| quantile-quantile     | 0.78 | 0.75        | 0.65 | 0.41 | 0.79 | 0.77         | 0.67 | 0.47 | 0.80 | 0.71   | 0.52 | 0.29 |  |
| upper quartile        | 0.71 | 0.68        | 0.59 | 0.36 | 0.82 | 0.79         | 0.73 | 0.50 | 0.78 | 0.63   | 0.45 | 0.24 |  |
| median                | 0.72 | 0.68        | 0.57 | 0.33 | 0.83 | 0.79         | 0.68 | 0.38 | 0.80 | 0.78   | 0.67 | 0.46 |  |
| total count           | 0.71 | 0.70        | 0.64 | 0.48 | 0.82 | 0.80         | 0.76 | 0.56 | 0.77 | 0.70   | 0.57 | 0.36 |  |
| rarefying             | 0.72 | 0.72        | 0.66 | 0.51 | 0.69 | 0.66         | 0.63 | 0.50 | 0.77 | 0.70   | 0.58 | 0.37 |  |

B: balanced, 10% effects added. 50% in each group,  
 LU: lightly-unbalanced, 10% effects added. 75%-25% in each group,  
 U: unbalanced, 10% effects added. 100% in only one group,  
 HU: heavily-unbalanced, 20% effects added. 100% in only one group.
