# Supplementary material for: Comparison of normalization methods for the analysis of metagenomic gene abundance data
Source: PubMed Central journal article supplement (PMC5910605; doi:10.1186/s12864-018-4637-6), 2018-04-20
Supplement: 12864_2018_4637_MOESM5_ESM.pdf [file 12864_2018_4637_MOESM5_ESM.pdf]

Table S2 False positive rate at a fix true positive rate of 0.50 for a group size of 10 + 10.

| <b>fold change: 3</b> |        | Human gut I |        |        |        | Human gut II |        |        |        | Marine |        |        |  |
|-----------------------|--------|-------------|--------|--------|--------|--------------|--------|--------|--------|--------|--------|--------|--|
| Method                | B      | LU          | U      | HU     | B      | LU           | U      | HU     | B      | LU     | U      | HU     |  |
| TMM                   | 9.5E-4 | 1.3E-3      | 2.5E-3 | 1.4E-2 | 2.2E-3 | 1.1E-3       | 3.3E-3 | 1.6E-2 | 0      | 3.2E-4 | 6.3E-4 | 3.6E-3 |  |
| RLE                   | 9.5E-4 | 1.4E-3      | 4.1E-3 | 2.8E-2 | 2.2E-3 | 1.1E-3       | 3.3E-3 | 1.6E-2 | 0      | 3.2E-4 | 9.5E-4 | 1.2E-2 |  |
| CSS                   | 1.9E-3 | 2.9E-3      | 7.1E-3 | 3.7E-2 | 1.7E-3 | 1.1E-3       | 5.6E-3 | 4.1E-2 | 3.2E-4 | 3.2E-4 | 1.3E-3 | 1.1E-2 |  |
| RCSS                  | 1.3E-3 | 2.4E-3      | 3.5E-3 | 2.6E-2 | 2.2E-3 | 2.2E-3       | 3.3E-3 | 1.4E-2 | 3.2E-4 | 6.3E-4 | 1.1E-2 | 8.6E-2 |  |
| quantile-quantile     | 3.2E-4 | 9.5E-4      | 4.6E-3 | 5.2E-2 | 2.2E-3 | 2.2E-3       | 7.8E-3 | 3.6E-2 | 3.2E-4 | 1.3E-3 | 2.0E-2 | 1.3E-1 |  |
| upper quartile        | 1.3E-3 | 2.2E-3      | 1.2E-2 | 1.0E-1 | 2.2E-3 | 2.2E-3       | 5.6E-3 | 3.6E-2 | 3.2E-4 | 1.3E-3 | 5.0E-2 | 2.0E-1 |  |
| median                | 1.6E-3 | 3.2E-3      | 1.0E-2 | 6.6E-2 | 2.2E-3 | 2.2E-3       | 8.9E-3 | 6.7E-2 | 3.2E-4 | 3.2E-4 | 2.2E-3 | 3.1E-2 |  |
| total count           | 1.1E-3 | 1.9E-3      | 4.8E-3 | 3.9E-2 | 2.2E-3 | 1.1E-3       | 4.4E-3 | 2.3E-2 | 3.2E-4 | 6.3E-4 | 1.2E-2 | 9.8E-2 |  |
| rarefying             | 9.5E-4 | 1.3E-3      | 3.0E-3 | 2.8E-2 | 1.1E-2 | 1.1E-2       | 1.6E-2 | 3.8E-2 | 3.2E-4 | 6.3E-4 | 9.8E-3 | 8.5E-2 |  |
| <b>fold change: 5</b> |        | Human gut I |        |        |        | Human gut II |        |        |        | Marine |        |        |  |
| Method                | B      | LU          | U      | HU     | B      | LU           | U      | HU     | B      | LU     | U      | HU     |  |
| TMM                   | 0      | 0           | 0      | 1.4E-3 | 0      | 0            | 0      | 2.5E-3 | 0      | 0      | 0      | 3.6E-4 |  |
| RLE                   | 0      | 0           | 1.6E-4 | 5.7E-3 | 0      | 0            | 0      | 1.3E-3 | 0      | 0      | 0      | 1.3E-3 |  |
| CSS                   | 0      | 1.6E-4      | 1.3E-3 | 1.9E-2 | 0      | 0            | 1.1E-3 | 2.3E-2 | 0      | 0      | 0      | 7.1E-3 |  |
| RCSS                  | 0      | 0           | 3.2E-4 | 6.1E-3 | 0      | 0            | 0      | 1.3E-3 | 0      | 0      | 1.9E-3 | 5.8E-2 |  |
| quantile-quantile     | 0      | 0           | 9.5E-4 | 2.9E-2 | 0      | 0            | 1.1E-3 | 1.5E-2 | 0      | 3.2E-4 | 7.5E-3 | 9.9E-2 |  |
| upper quartile        | 0      | 0           | 1.9E-3 | 6.1E-2 | 0      | 0            | 0      | 1.0E-2 | 0      | 3.2E-4 | 2.9E-2 | 2.2E-1 |  |
| median                | 0      | 3.2E-4      | 3.0E-3 | 6.9E-2 | 0      | 0            | 1.1E-3 | 2.9E-2 | 0      | 0      | 3.2E-4 | 2.5E-2 |  |
| total count           | 0      | 0           | 3.2E-4 | 1.4E-2 | 0      | 0            | 0      | 5.0E-3 | 0      | 0      | 2.4E-3 | 7.5E-2 |  |
| rarefying             | 0      | 0           | 3.2E-4 | 8.4E-3 | 1.1E-3 | 1.1E-3       | 2.8E-3 | 1.0E-2 | 0      | 0      | 1.9E-3 | 6.3E-2 |  |

B: balanced, 10% effects added. 50% in each group,  
 LU: lightly-unbalanced, 10% effects added. 75%-25% in each group,  
 U: unbalanced, 10% effects added. 100% in only one group,  
 HU: heavily-unbalanced, 20% effects added. 100% in only one group.
