# Supplementary material for: Comparison of normalization methods for the analysis of metagenomic gene abundance data
Source: PubMed Central journal article supplement (PMC5910605; doi:10.1186/s12864-018-4637-6), 2018-04-20
Supplement: 12864_2018_4637_MOESM7_ESM.pdf [file 12864_2018_4637_MOESM7_ESM.pdf]

**Table S3 True false discovery rate at an estimated false discovery rate of 0.05 for a group size of 10 + 10.**

| <b>fold change: 3</b> |       | Human gut I |       |       |       | Human gut II |       |       |       | Marine |       |       |  |
|-----------------------|-------|-------------|-------|-------|-------|--------------|-------|-------|-------|--------|-------|-------|--|
| Method                | B     | LU          | U     | HU    | B     | LU           | U     | HU    | B     | LU     | U     | HU    |  |
| TMM                   | 0.022 | 0.025       | 0.032 | 0.109 | 0.038 | 0.033        | 0.040 | 0.123 | 0.019 | 0.019  | 0.032 | 0.131 |  |
| RLE                   | 0.021 | 0.027       | 0.039 | 0.190 | 0.042 | 0.034        | 0.044 | 0.118 | 0.020 | 0.021  | 0.037 | 0.258 |  |
| CSS                   | 0.027 | 0.025       | 0.029 | 0.119 | 0.036 | 0.022        | 0.050 | 0.193 | 0.019 | 0.020  | 0.026 | 0.156 |  |
| RCSS                  | 0.022 | 0.031       | 0.041 | 0.163 | 0.040 | 0.032        | 0.045 | 0.111 | 0.021 | 0.042  | 0.243 | 0.490 |  |
| quantile-quantile     | 0.016 | 0.028       | 0.071 | 0.325 | 0.024 | 0.021        | 0.045 | 0.138 | 0.024 | 0.061  | 0.334 | 0.567 |  |
| upper quartile        | 0.021 | 0.036       | 0.109 | 0.432 | 0.046 | 0.036        | 0.055 | 0.205 | 0.023 | 0.096  | 0.527 | 0.644 |  |
| median                | 0.022 | 0.027       | 0.041 | 0.229 | 0.033 | 0.031        | 0.054 | 0.213 | 0.017 | 0.020  | 0.034 | 0.264 |  |
| total count           | 0.021 | 0.032       | 0.049 | 0.240 | 0.038 | 0.037        | 0.055 | 0.167 | 0.020 | 0.042  | 0.262 | 0.514 |  |
| rarefying             | 0.018 | 0.022       | 0.042 | 0.212 | 0.029 | 0.046        | 0.065 | 0.098 | 0.014 | 0.039  | 0.226 | 0.500 |  |
| <b>fold change: 5</b> |       | Human gut I |       |       |       | Human gut II |       |       |       | Marine |       |       |  |
| Method                | B     | LU          | U     | HU    | B     | LU           | U     | HU    | B     | LU     | U     | HU    |  |
| TMM                   | 0.027 | 0.027       | 0.040 | 0.103 | 0.040 | 0.041        | 0.048 | 0.138 | 0.019 | 0.016  | 0.033 | 0.158 |  |
| RLE                   | 0.025 | 0.029       | 0.059 | 0.220 | 0.039 | 0.032        | 0.048 | 0.088 | 0.018 | 0.018  | 0.048 | 0.305 |  |
| CSS                   | 0.033 | 0.047       | 0.071 | 0.338 | 0.039 | 0.048        | 0.093 | 0.340 | 0.018 | 0.021  | 0.077 | 0.460 |  |
| RCSS                  | 0.027 | 0.029       | 0.055 | 0.221 | 0.043 | 0.043        | 0.051 | 0.115 | 0.021 | 0.082  | 0.330 | 0.498 |  |
| quantile-quantile     | 0.023 | 0.042       | 0.141 | 0.426 | 0.028 | 0.034        | 0.063 | 0.193 | 0.029 | 0.103  | 0.460 | 0.607 |  |
| upper quartile        | 0.030 | 0.045       | 0.187 | 0.505 | 0.041 | 0.049        | 0.077 | 0.257 | 0.020 | 0.199  | 0.675 | 0.678 |  |
| median                | 0.028 | 0.056       | 0.152 | 0.525 | 0.028 | 0.048        | 0.078 | 0.372 | 0.015 | 0.023  | 0.124 | 0.625 |  |
| total count           | 0.027 | 0.034       | 0.093 | 0.307 | 0.042 | 0.046        | 0.070 | 0.193 | 0.020 | 0.093  | 0.382 | 0.532 |  |
| rarefying             | 0.018 | 0.026       | 0.063 | 0.282 | 0.050 | 0.050        | 0.057 | 0.093 | 0.020 | 0.072  | 0.334 | 0.515 |  |

B: balanced, 10% effects added. 50% in each group,  
 LU: lightly-unbalanced, 10% effects added. 75%-25% is each group,  
 U: unbalanced, 10% effects added. 100% in only one group,  
 HU: heavily-unbalanced, 20% effects added. 100% in only one group.
