# Supplementary material for: Comparison of normalization methods for the analysis of metagenomic gene abundance data
Source: PubMed Central journal article supplement (PMC5910605; doi:10.1186/s12864-018-4637-6), 2018-04-20

tFDR at fix eFDR (p-values adjusted using Benjamini–Yekutieli correction)

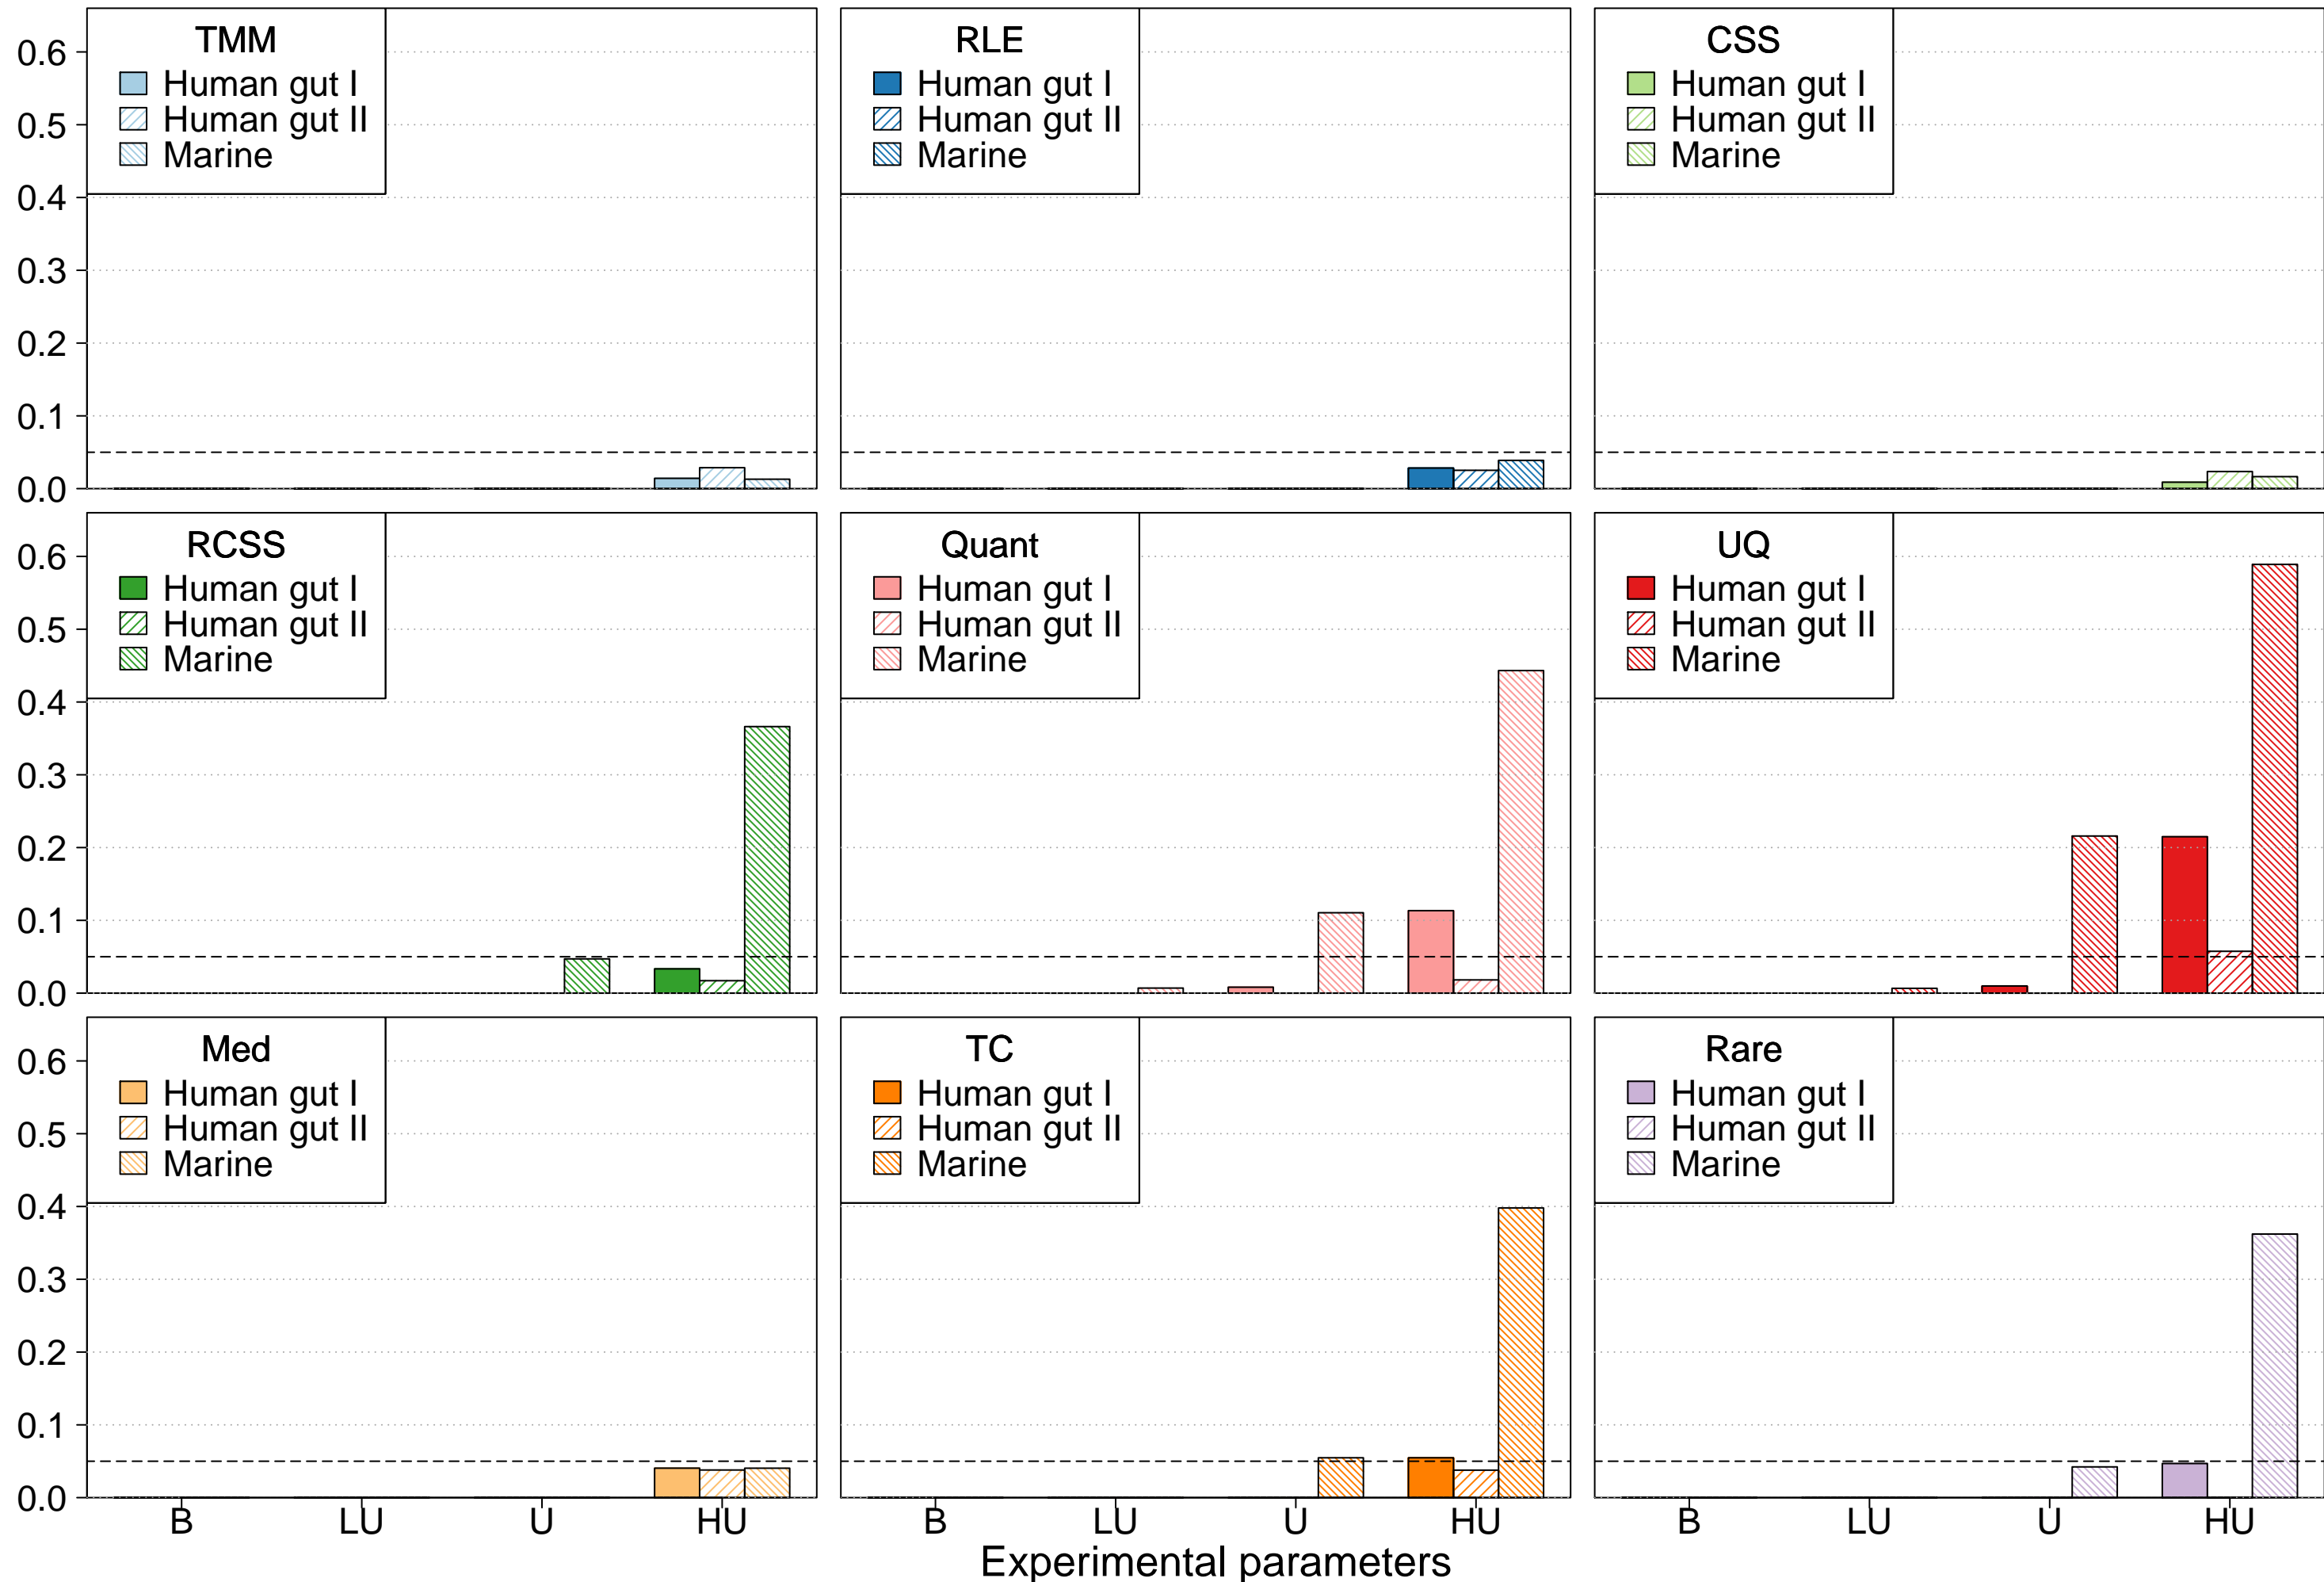

Supplement: 12864_2018_4637_MOESM8_ESM.pdf [file 12864_2018_4637_MOESM8_ESM.pdf]
